# Supplementary material for: Ultrathin efficient perovskite solar cells employing a periodic structure of a composite hole conductor for elevated plasmonic light harvesting and hole collection
Source: Royal Society of Chemistry journal article supplement (doi:10.1039/c5nr05042a), 2015-08-31
Supplement: c5nr05042a1.pdf [file c5nr05042a1.pdf]

Electronic Supporting Information

# Ultrathin Efficient Perovskite Solar Cell Employing Periodic Structure of Composite Hole Conductor for Elevated Plasmonic Light Harvesting and Hole Collection

*Mingzhu Long,<sup>1, ‡</sup> Zefeng Chen,<sup>1, ‡</sup> Tiankai Zhang,<sup>1</sup> Yubin Xiao,<sup>1</sup> Xiaoliang Zeng,<sup>3</sup> Jian  
Chen,<sup>2</sup> Keyou Yan,<sup>1, \*</sup> Jianbin Xu<sup>1, \*</sup>*

1. Department of Electronic Engineering, The Chinese University of Hong Kong, Hong  
Kong, SAR, P. R. China

Corresponding author: E-mail: yankeyou@gmail.com; jbxu@ee.cuhk.edu.hk

2. Shenzhen Institute of Advanced Technology, Chinese Academy of Science, Shenzhen,  
518055, P. R. China

3. Instrumental Analysis and Research Center, Sun Yat-sen University, Guangzhou,  
510275, P. R. China

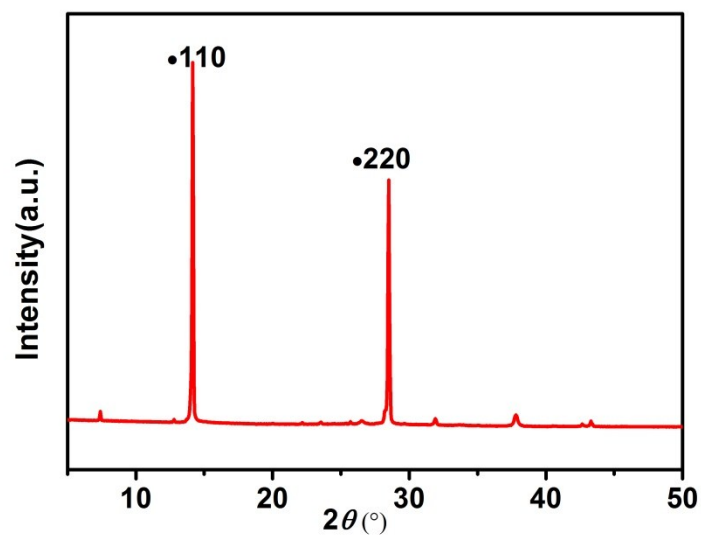

Figure S1 XRD patterns corresponding to the perovskite thin film in the device

As shown in the XRD, the perovskite thin film has excellent crystallite with prevalent peaks at  $14.17^\circ$ ,  $28.38^\circ$  and  $43.3^\circ$ , which suggests that the film is well crystallized.

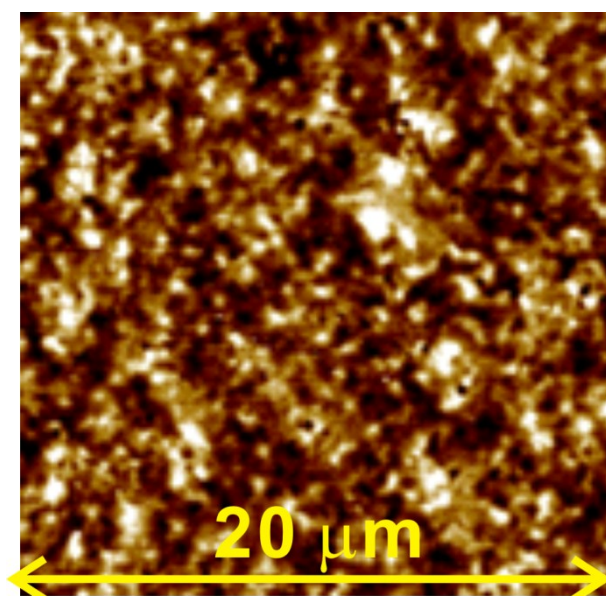

Figure S2 AFM images of 3D PMC HTM perovskite solar cell

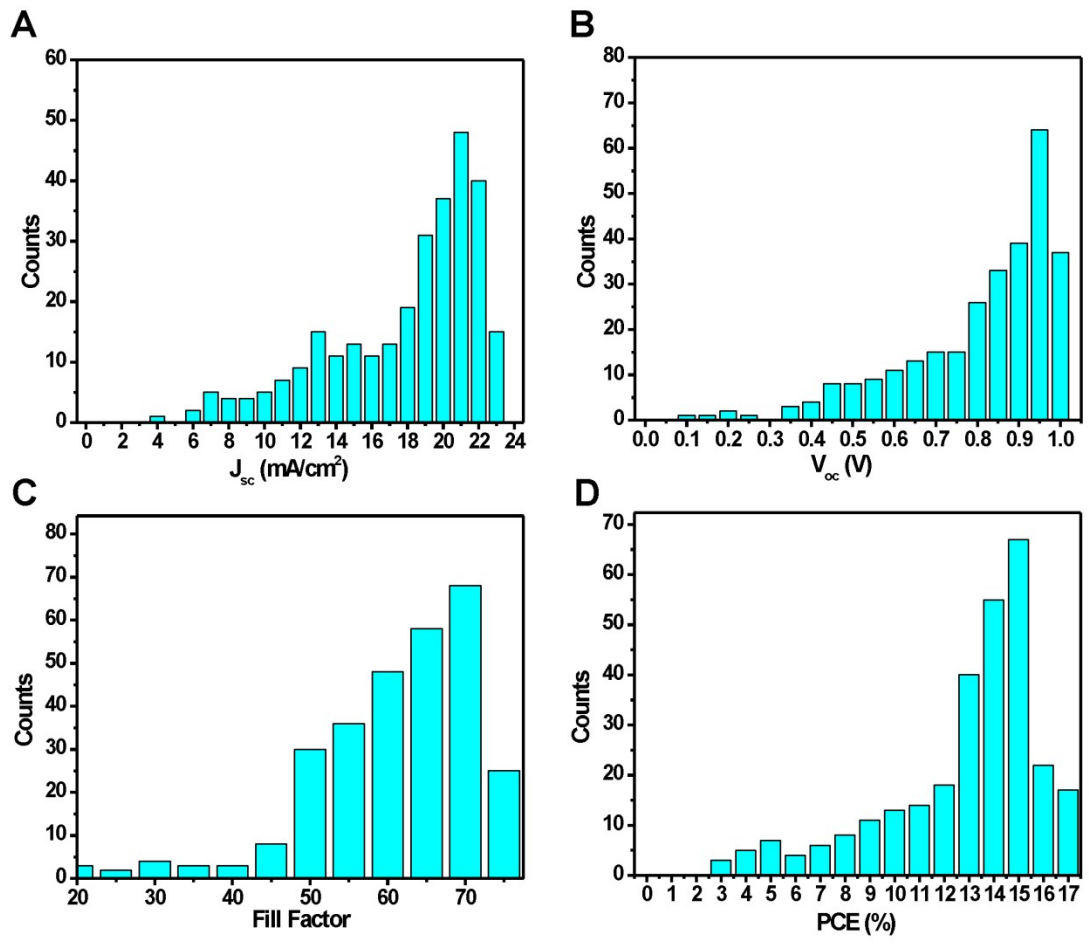

Figure S3 Performance statistics for 3D PMC HTM

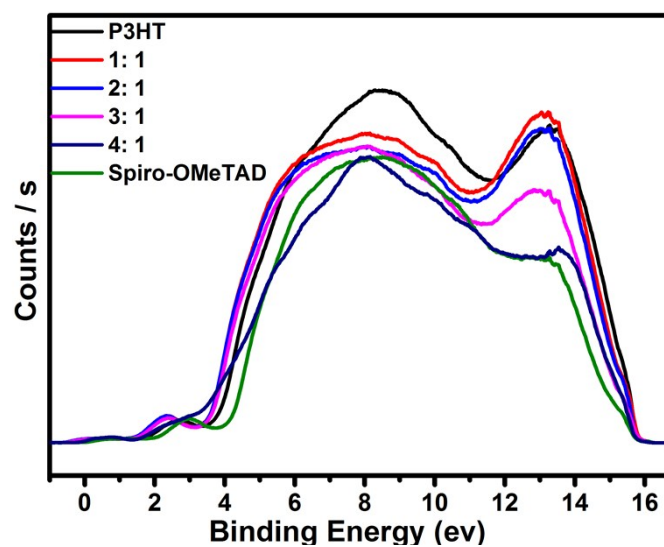

Figure S3 Ultraviolet photoelectron spectra (UPS) of HTMs on FTO

UPS spectra of the secondary electron cutoff energy onset and the HOMO energy level for the HTM are shown in Fig. S3. The electron secondary cutoff energy increases with the P3HT mixture. This is corresponding to the decreased  $V_{oc}$  compared to the device with spiro as the HTM.
